# Supplementary material for: Ir/IrOx/WO3 electrocatalysts for water splitting
Source: Royal Society of Chemistry journal article supplement (doi:10.1039/d3qm00550j), 2023-01-01
Supplement: d3qm00550j1.pdf [file d3qm00550j1.pdf]

**Supporting Information for**  
**“Ir/IrO<sub>x</sub>/WO<sub>3</sub> Electrocatalysts for Water Splitting”**

Xiaohe Tan,<sup>a, b</sup> Wangyan Gou,<sup>b</sup> Linqing Liao,<sup>b</sup> Yuanyuan Ma<sup>\*a, b</sup> and Yongquan Qu<sup>\*b</sup>

<sup>a</sup>. Research & Development Institute of Northwestern Polytechnical University in  
Shenzhen, Shenzhen, 518057, China.

<sup>b</sup>. School of Chemistry and Chemical Engineering, Northwestern Polytechnical  
University, Xi'an, 710072, China.

Email: [yyma@nwpu.edu.cn](mailto:yyma@nwpu.edu.cn) and [yongquan@nwpu.edu.cn](mailto:yongquan@nwpu.edu.cn)

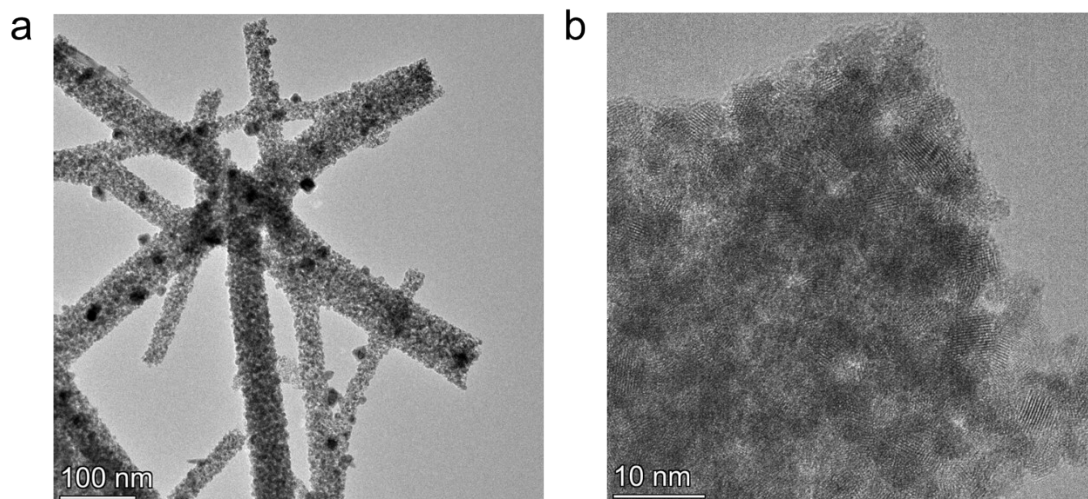

**Fig. S1.** (a) TEM image and (b) HRTEM image of Ir/IrO<sub>x</sub>/WO<sub>3</sub>-550.

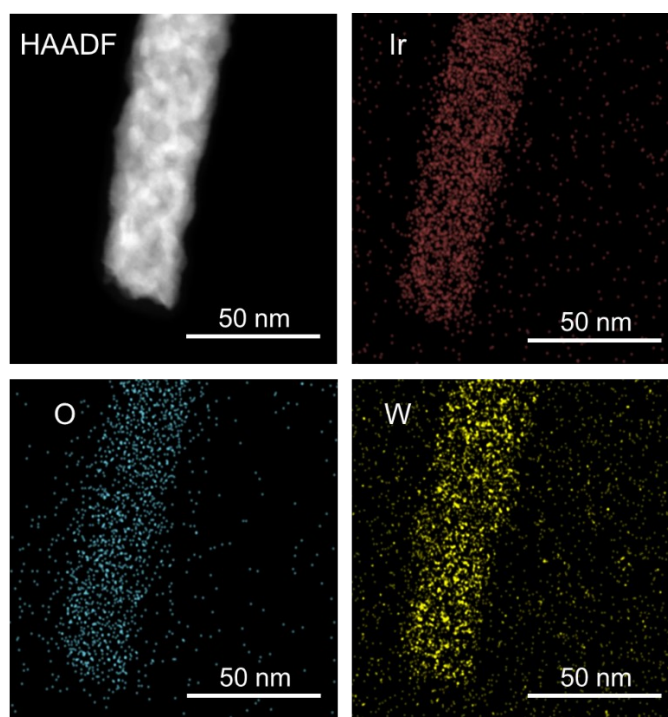

**Fig. S2.** Elemental X-ray mapping images of Ir/IrO<sub>x</sub>/WO<sub>3</sub>-350.

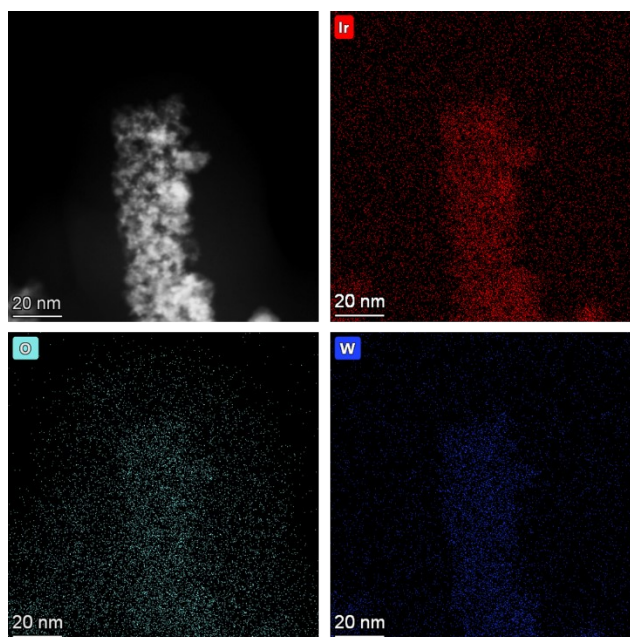

**Fig. S3.** Elemental X-ray mapping images of IrO<sub>x</sub>/WO<sub>3</sub>-550.

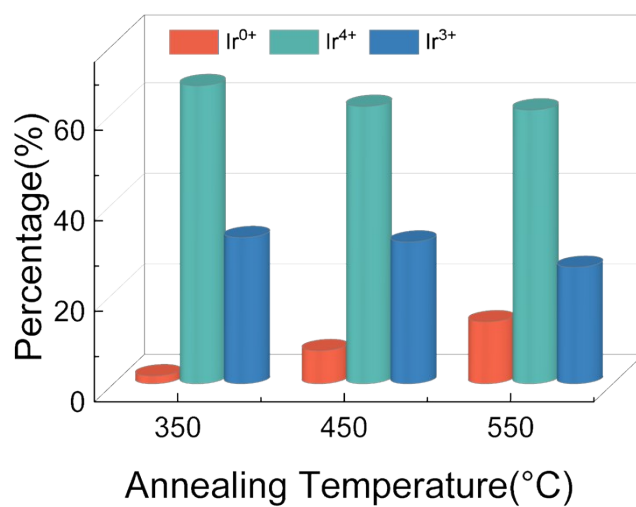

**Fig. S4.** The proportions of various oxidation states of Ir as-synthesized Ir/IrO<sub>x</sub>/WO<sub>3</sub> electrocatalysts.

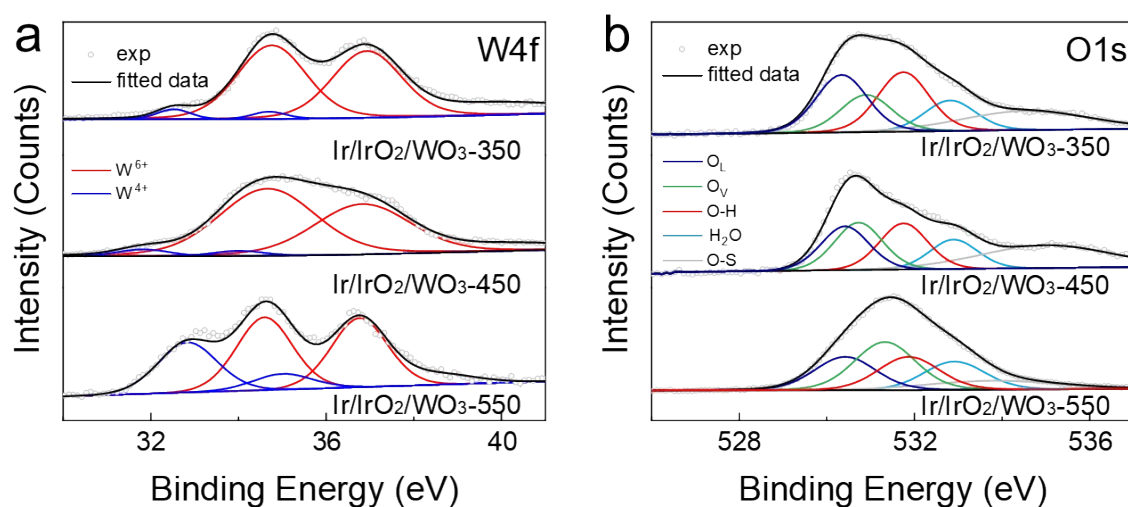

**Fig. S5.** (a) W 4f XPS spectra and (b) O1s XPS spectra of as-synthesized IrO<sub>x</sub>/WO<sub>3</sub>.

**Table S1.** The proportion statistics of iridium species from Ir 4f XPS spectra.

| Catalyst                                  | Ir <sup>0</sup> | Ir <sup>3+</sup> | Ir <sup>4+</sup> |
|-------------------------------------------|-----------------|------------------|------------------|
| Ir/IrO <sub>x</sub> /WO <sub>3</sub> -350 | 1.77            | 32.34            | 65.89            |
| Ir/IrO <sub>x</sub> /WO <sub>3</sub> -450 | 7.35            | 31.34            | 61.31            |
| Ir/IrO <sub>x</sub> /WO <sub>3</sub> -550 | 13.72           | 25.76            | 60.52            |

**Table S2.** The proportion statistics of tungsten species from W 4f XPS spectra.

| Catalyst                                  | W <sup>6+</sup> | W <sup>4+</sup> |
|-------------------------------------------|-----------------|-----------------|
| Ir/IrO <sub>x</sub> /WO <sub>3</sub> -350 | 94.22           | 5.78            |
| Ir/IrO <sub>x</sub> /WO <sub>3</sub> -450 | 94.88           | 5.12            |
| Ir/IrO <sub>x</sub> /WO <sub>3</sub> -550 | 67.08           | 32.92           |

**Table S3.** The proportion statistics of oxygen species from O 1s XPS spectra.

| Catalyst                                  | H <sub>2</sub> O | S-O   | O <sub>I</sub> | O-H   | O <sub>V</sub> |
|-------------------------------------------|------------------|-------|----------------|-------|----------------|
| Ir/IrO <sub>x</sub> /WO <sub>3</sub> -350 | 13.19            | 20.13 | 24.86          | 25.72 | 16.10          |
| Ir/IrO <sub>x</sub> /WO <sub>3</sub> -450 | 12.80            | 27.49 | 19.00          | 20.09 | 20.62          |
| Ir/IrO <sub>x</sub> /WO <sub>3</sub> -550 | 17.52            | 11.66 | 20.61          | 20.53 | 29.69          |

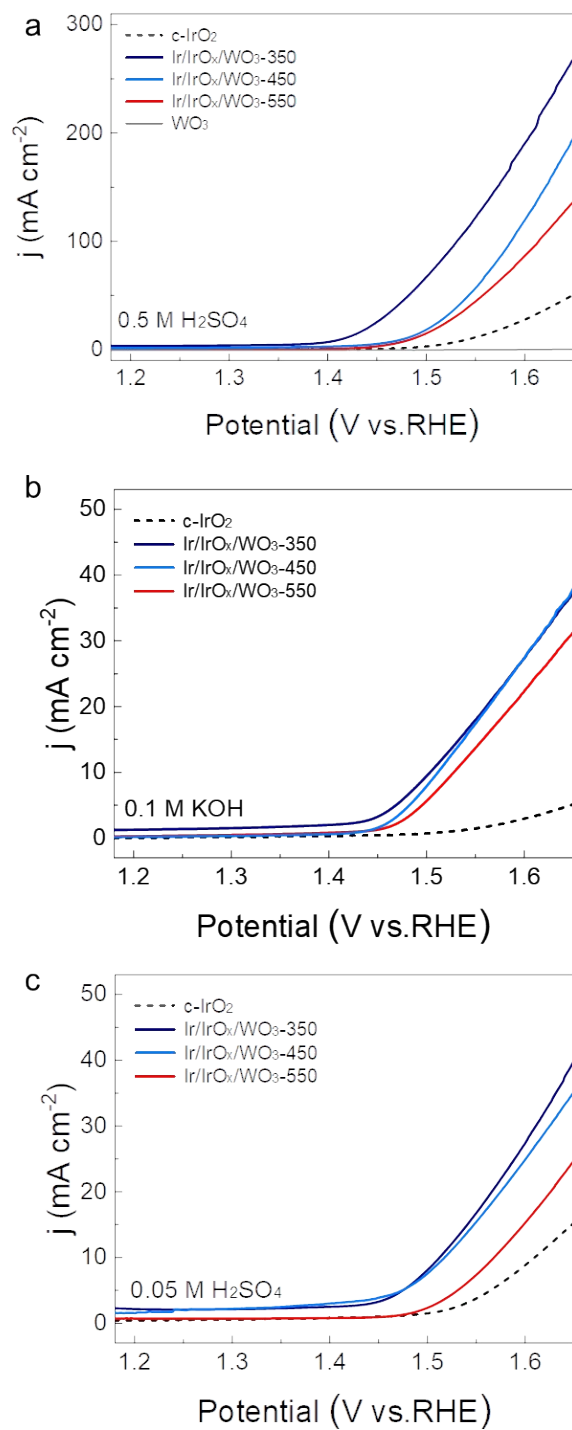

**Fig. S6.** Polarization curves (current density normalized by the geometric areas of the electroactive materials) of the as-synthesized Ir/IrO<sub>x</sub>/WO<sub>3</sub> and c-IrO<sub>2</sub> in (a) 0.5 M H<sub>2</sub>SO<sub>4</sub>; (b) 0.1 M KOH; (c) 0.05M H<sub>2</sub>SO<sub>4</sub>.

**Table S4.** Summary of Ir-based catalysts as OER electrocatalysts.

| Catalyst                                 | Electrolyte                                            | Overpotential at 10 mA<br>cm <sup>-2</sup> (mV) | Stability at 10<br>mA cm <sup>-2</sup> (h) | Ref                  |
|------------------------------------------|--------------------------------------------------------|-------------------------------------------------|--------------------------------------------|----------------------|
| <b>Ir/IrO<sub>x</sub>/WO<sub>3</sub></b> | <b>0.5M H<sub>2</sub>SO<sub>4</sub>;<br/>1.0 M KOH</b> | <b>185;<br/>232</b>                             | <b>80</b>                                  | <b>This<br/>work</b> |
| Ir <sub>1</sub> @Co/NC                   | 1.0 M KOH                                              | 260                                             | 5                                          | 1                    |
| Ir <sub>SA</sub> -NiO                    | 1.0 M KOH                                              | 215                                             | 10                                         | 2                    |
| Ir <sub>SA</sub> -CoO <sub>x</sub> ANSs  | 1.0 M KOH                                              | 152 ± 5.2                                       | 10                                         | 3                    |
| Ir-CoM LDHs (M = Ni, Fe, Mn,<br>and Zn)  | 1.0 M KOH                                              | 262                                             | 60                                         | 4                    |
| IrRu@Te                                  | 0.5M H <sub>2</sub> SO <sub>4</sub>                    | 220                                             | 20                                         | 5                    |
| IrO <sub>2</sub> @Ir/TiN                 | 0.5M H <sub>2</sub> SO <sub>4</sub>                    | 265                                             | 6                                          | 6                    |
| ATO-supported Ir NDs                     | 0.05M H <sub>2</sub> SO <sub>4</sub>                   | 280                                             | 15                                         | 7                    |
| Ru@IrO <sub>x</sub>                      | 0.05M H <sub>2</sub> SO <sub>4</sub>                   | 282                                             | 24                                         | 8                    |
| Ir-MnO <sub>2</sub>                      | 0.5M H <sub>2</sub> SO <sub>4</sub>                    | 218                                             | 650                                        | 9                    |
| TiN/IrO <sub>2</sub>                     | 0.5M H <sub>2</sub> SO <sub>4</sub>                    | 313                                             | 3                                          | 10                   |
| Ir-W@Ir-WO <sub>3-x</sub>                | 0.5M H <sub>2</sub> SO <sub>4</sub>                    | 261                                             | 20                                         | 11                   |
| IrO <sub>2</sub> /GCN                    | 0.5M H <sub>2</sub> SO <sub>4</sub>                    | 276                                             | 5                                          | 12                   |
| AA-IrO <sub>x</sub>                      | 0.5M H <sub>2</sub> SO <sub>4</sub>                    | 370                                             | 8                                          | 13                   |
| Au@AuIr <sub>2</sub>                     | 0.5M H <sub>2</sub> SO <sub>4</sub>                    | -                                               | 40                                         | 14                   |
| Ir-SA@Fe@NCNT                            | 0.5M H <sub>2</sub> SO <sub>4</sub>                    | 250                                             | 12                                         | 15                   |

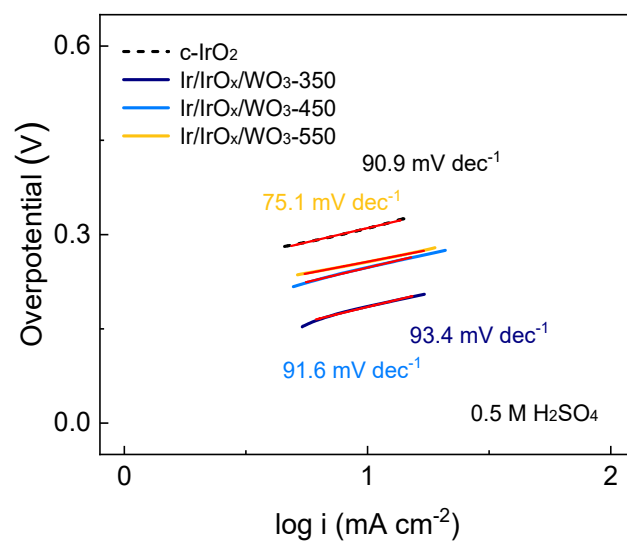

**Fig. S7.** Tafel plots of as-synthesized Ir/IrO<sub>x</sub>/WO<sub>3</sub> and c-IrO<sub>2</sub> in 0.5 M H<sub>2</sub>SO<sub>4</sub>.

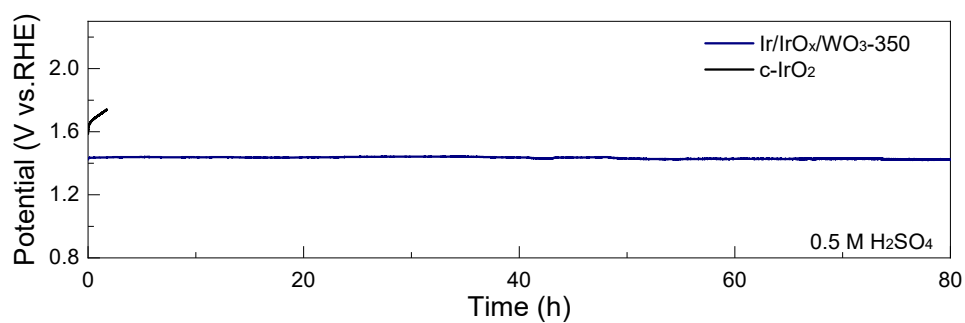

**Fig. S8.** Galvanostatic stability of the OER at the current density of 10 mA/cm<sup>2</sup> over as-synthesized Ir/IrO<sub>x</sub>/WO<sub>3</sub> and c-IrO<sub>2</sub> in 0.5 M H<sub>2</sub>SO<sub>4</sub>.

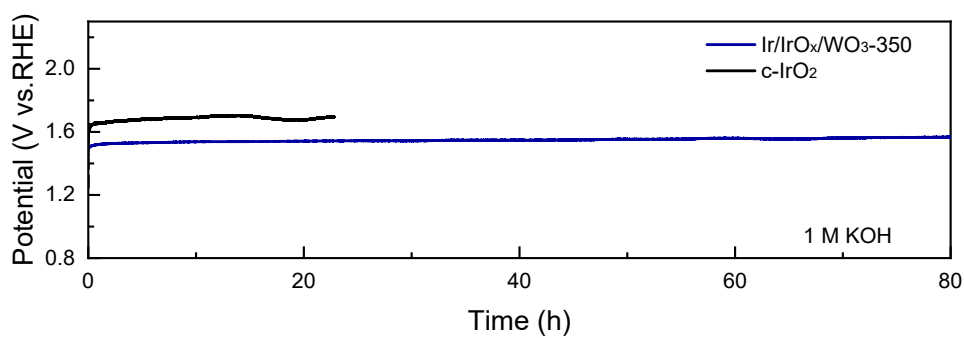

**Fig. S9.** Galvanostatic stability of the OER at the current density of 10 mA/cm<sup>2</sup> over d as-synthesized Ir/IrO<sub>x</sub>/WO<sub>3</sub> and c-IrO<sub>2</sub> in 1.0 M KOH.

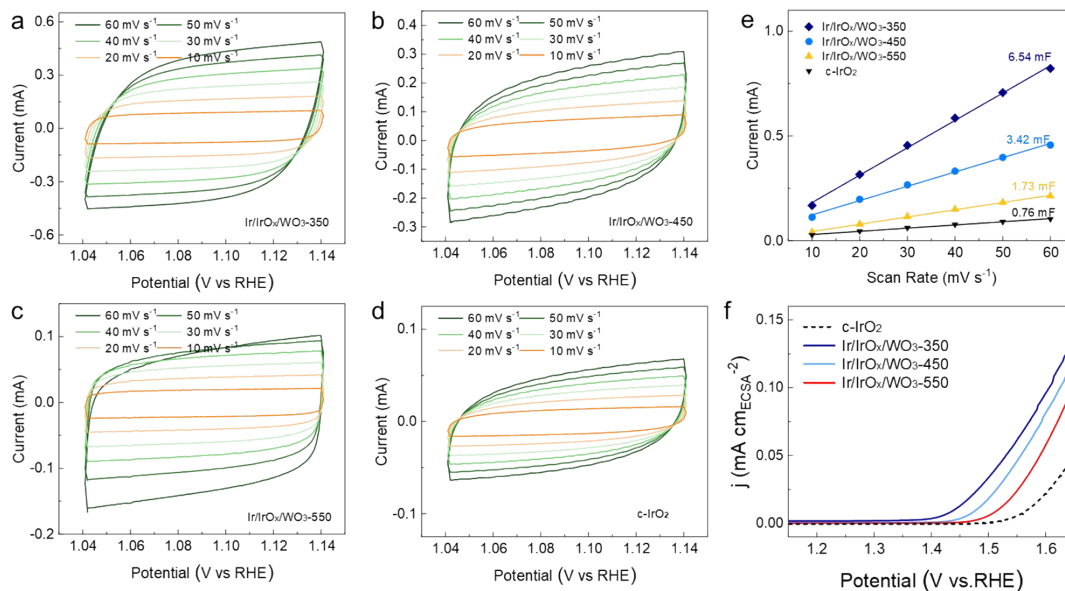

**Fig. S10.** CV curves of (a) Ir/IrO<sub>x</sub>/WO<sub>3</sub> -350; (b) Ir/IrO<sub>x</sub>/WO<sub>3</sub> -450; (c) Ir/IrO<sub>x</sub>/WO<sub>3</sub> -550; (d) c-IrO<sub>2</sub> collected at various scan rates (10, 20, 30, 40, 50 and 60 mV s<sup>-1</sup>); (e) The double layer capacitance (C<sub>DL</sub>) of as-synthesized Ir/IrO<sub>x</sub>/WO<sub>3</sub> -350, Ir/IrO<sub>x</sub>/WO<sub>3</sub> -450, Ir/IrO<sub>x</sub>/WO<sub>3</sub> -550 and c-IrO<sub>2</sub>; (f) Polarization curves (current normalized by ECSA) of as-synthesized Ir/IrO<sub>x</sub>/WO<sub>3</sub> -350, Ir/IrO<sub>x</sub>/WO<sub>3</sub> -450, Ir/IrO<sub>x</sub>/WO<sub>3</sub> -550 and c-IrO<sub>2</sub>.

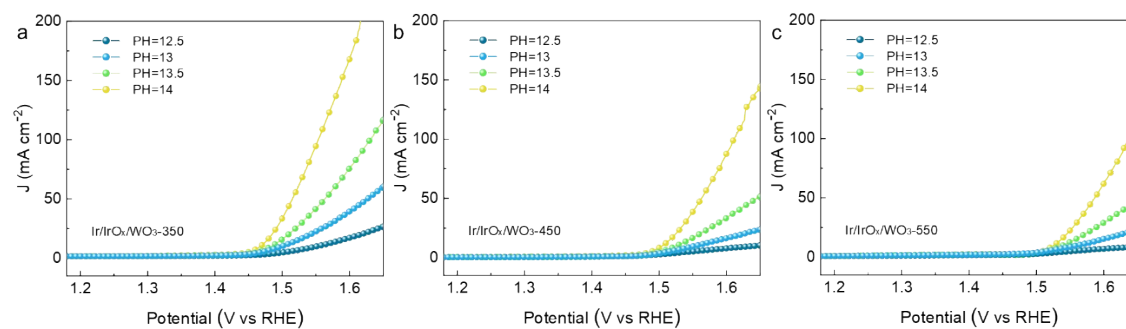

**Fig. S11.** pH dependence of the OER activities (a) Ir/IrO<sub>x</sub>/WO<sub>3</sub>-350; (b) Ir/IrO<sub>x</sub>/WO<sub>3</sub>-450; (c) Ir/IrO<sub>x</sub>/WO<sub>3</sub>-550 in KOH.



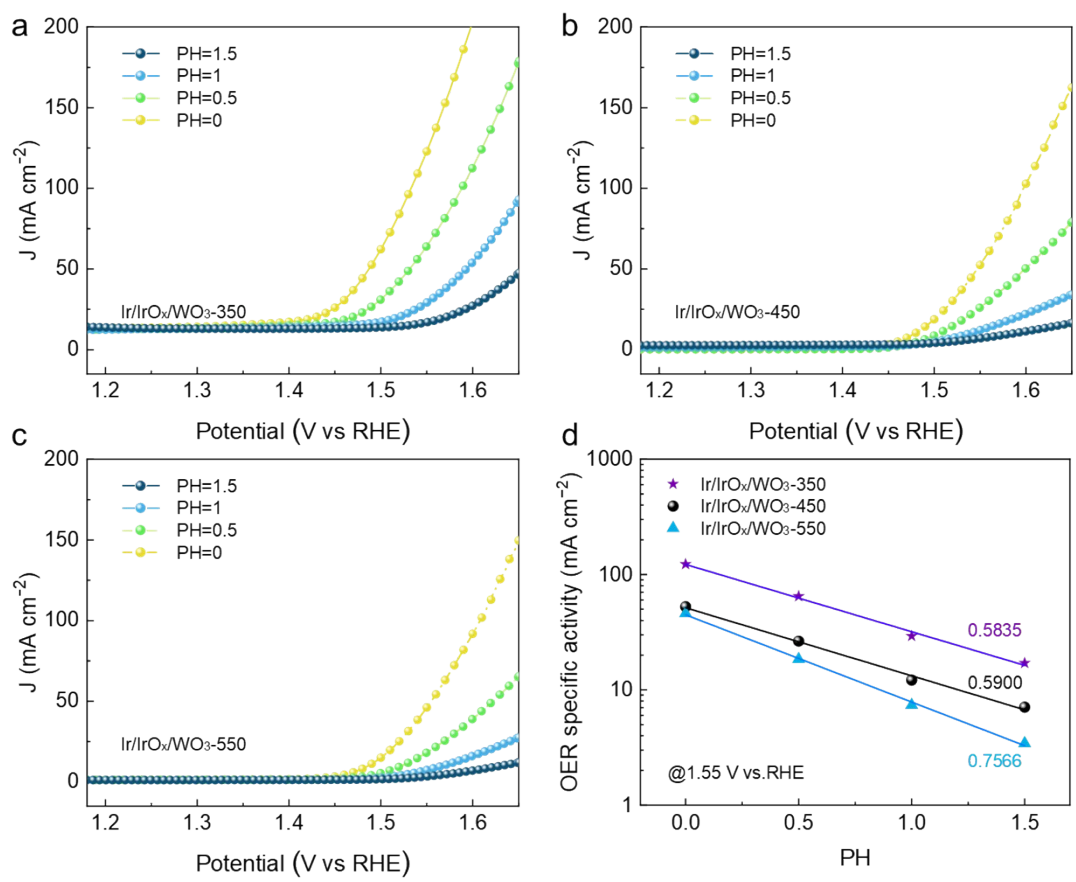

**Fig. S12.** pH dependence of the OER activities (a) Ir/IrO<sub>x</sub>/WO<sub>3</sub>-350; (b) Ir/IrO<sub>x</sub>/WO<sub>3</sub>-450; (c) Ir/IrO<sub>x</sub>/WO<sub>3</sub>-550 in H<sub>2</sub>SO<sub>4</sub>; (d) Current densities of Ir/IrO<sub>x</sub>/WO<sub>3</sub>-350, Ir/IrO<sub>x</sub>/WO<sub>3</sub>-450 and Ir/IrO<sub>x</sub>/WO<sub>3</sub>-550 at 1.55 V versus RHE as a function of the pH values of acidic electrolytes (H<sub>2</sub>SO<sub>4</sub>).

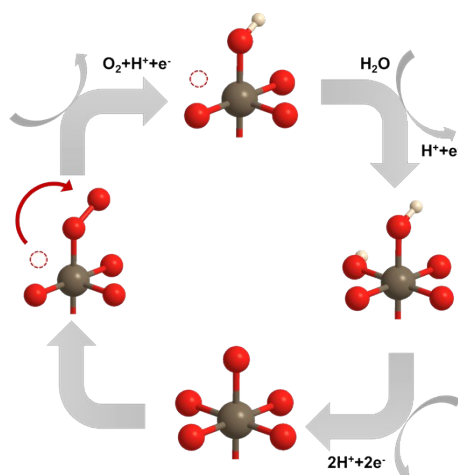

**Fig. S13.** OER mechanisms of LOM. The empty circle represents the oxygen vacancy. The gray, red and white balls represent Ir, O and H, respectively.

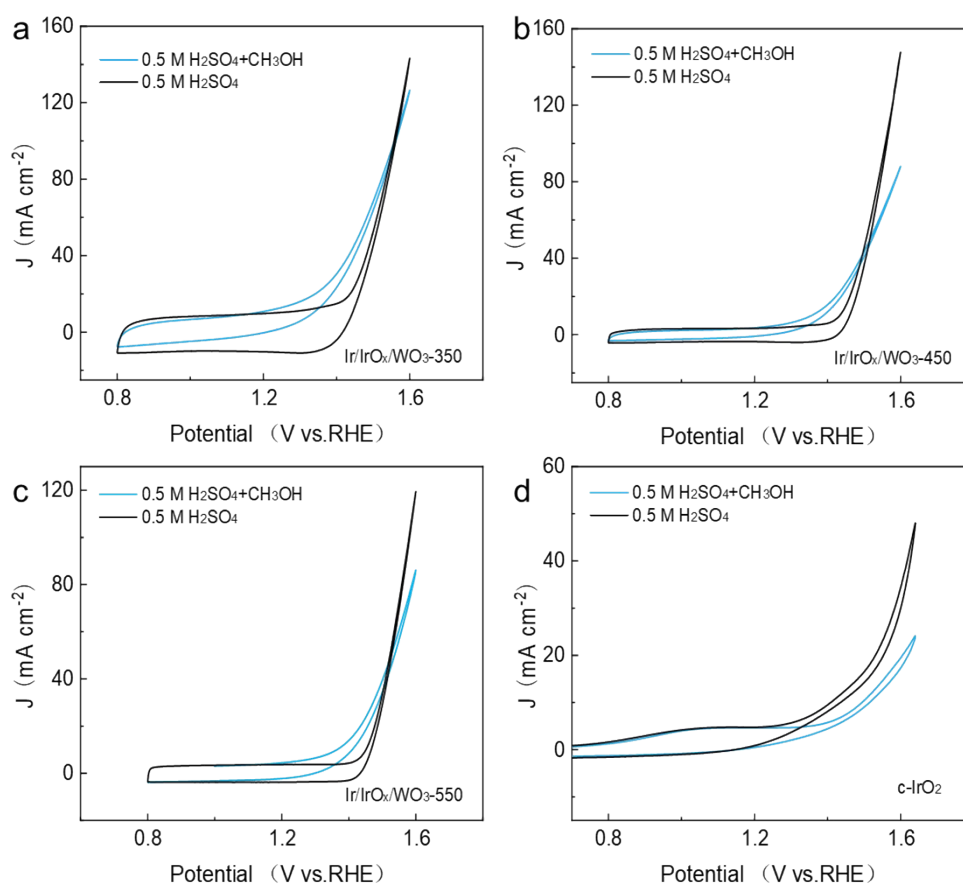

**Fig. S14.** CV curves of (a) Ir/IrO<sub>x</sub>/WO<sub>3</sub>-350; (b) Ir/IrO<sub>x</sub>/WO<sub>3</sub>-450; (c) Ir/IrO<sub>x</sub>/WO<sub>3</sub>-550 and (d) c-IrO<sub>2</sub> at a scanning rate of 10 mV/s before and after adding methanol in 0.5 M H<sub>2</sub>SO<sub>4</sub>.

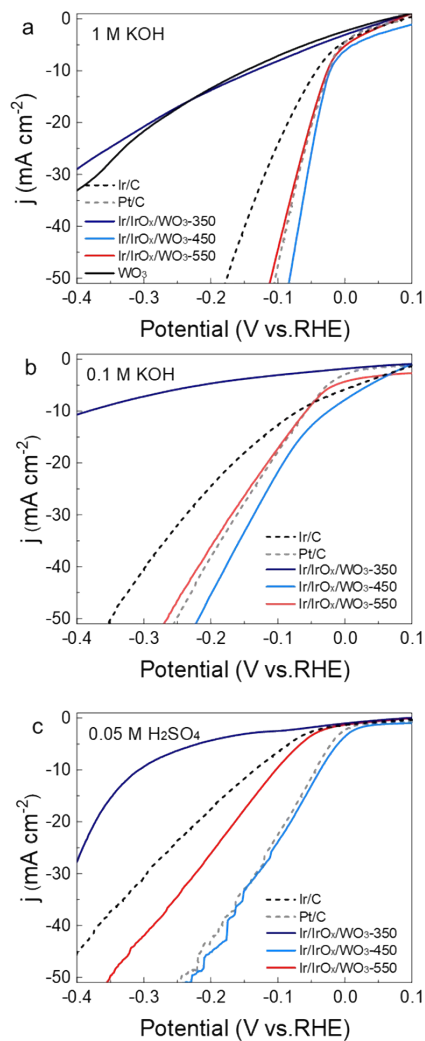

**Fig. S15.** Polarization curves of the as-synthesized Ir/IrO<sub>x</sub>/WO<sub>3</sub>-350, Ir/IrO<sub>x</sub>/WO<sub>3</sub>-450, Ir/IrO<sub>x</sub>/WO<sub>3</sub>-550, Ir/C and Pt/C in (a) 1.0 M KOH; (b) 0.1 M KOH; (c) 0.05 M H<sub>2</sub>SO<sub>4</sub>.

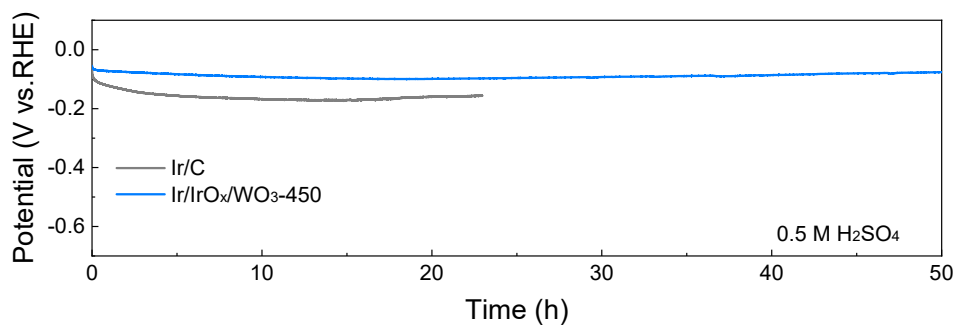

**Fig. S16.** Galvanostatic stability of the HER at the current density of 10 mA/cm<sup>2</sup> over as-synthesized Ir/IrO<sub>x</sub>/WO<sub>3</sub> and Ir/C in 0.5 M H<sub>2</sub>SO<sub>4</sub>.

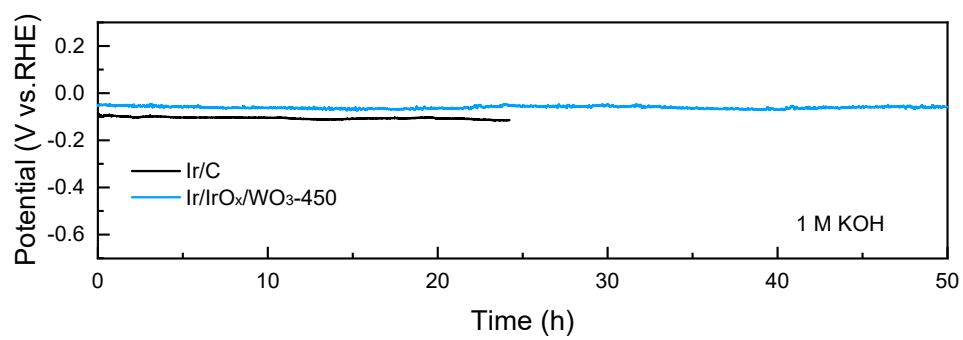

**Fig. S17.** Galvanostatic stability of the HER at the current density of 10 mA/cm<sup>2</sup> over as-synthesized Ir/IrO<sub>x</sub>/WO<sub>3</sub> and Ir/C in 1.0 M KOH.

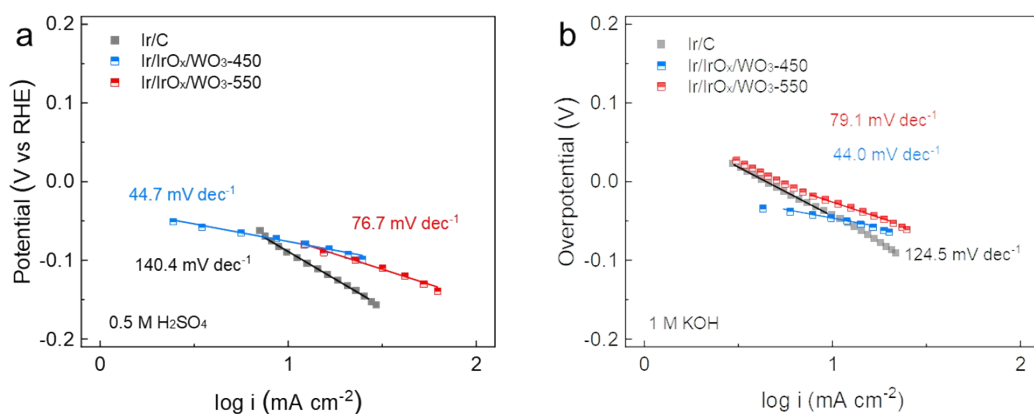

**Fig. S18.** Tafel slopes of Ir/IrO<sub>x</sub>/WO<sub>3</sub> and Ir/C in (a) acid electrolyte and (b) alkaline electrolyte.

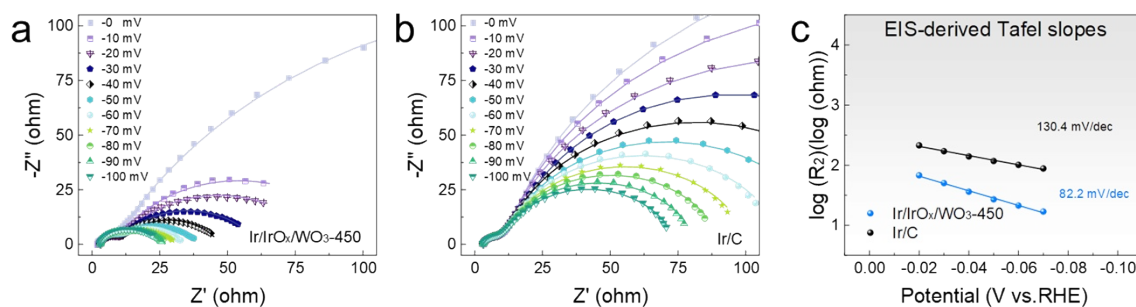

**Fig. S19.** (a) Ir/IrO<sub>x</sub>/WO<sub>3</sub>-450; and (b) Ir/C electrodes Nyquist graphs in 1.0 M KOH at various HER overpotentials. The dispersed symbols depict the experimental data, while the solid lines depict the simulated fitted outcomes. The similar circuit utilized in the simulation is shown in the top inset. (c) Tafel graphs in 1.0 M KOH produced from R<sub>2</sub> for Ir/IrO<sub>x</sub>/WO<sub>3</sub>-450 and Ir/C.

**Table S5.** The fitted parameters of the EIS data of the Ir/C electrode for HER.

| Ir/C  | R <sub>s</sub> | CPE <sub>2</sub> | n <sub>2</sub> | R <sub>2</sub> | C <sub>ads</sub> |
|-------|----------------|------------------|----------------|----------------|------------------|
| 0     | 2.657          | 0.0012643        | 0.81215        | 341.5          | 0.000338         |
| -0.01 | 3.146          | 0.001292         | 0.79992        | 406.7          | 0.000325         |
| -0.02 | 3.1            | 0.0011776        | 0.81875        | 358.4          | 0.000339         |
| -0.03 | 3.06           | 0.0012097        | 0.80505        | 351            | 0.000311         |
| -0.04 | 3.075          | 0.001138         | 0.81613        | 310.1          | 0.000318         |
| -0.05 | 3.066          | 0.0011242        | 0.81416        | 281.4          | 0.000307         |
| -0.06 | 3.058          | 0.0011148        | 0.811183       | 247            | 0.000296         |
| -0.07 | 3.071          | 0.0012129        | 0.78553        | 222.6          | 0.000262         |
| -0.08 | 3.057          | 0.0012158        | 0.77946        | 183.9          | 0.000249         |
| -0.09 | 3.074          | 0.0012024        | 0.7767         | 148            | 0.000239         |
| -0.1  | 3.07           | 0.0012131        | 0.76782        | 122.2          | 0.000222         |

**Table S6.** The fitted parameters of the EIS data of the Ir/IrO<sub>x</sub>/WO<sub>3</sub>-450 electrode for HER.

| Ir/IrO <sub>x</sub> /WO <sub>3</sub> -450 | CPE <sub>2</sub> | CPE <sub>2</sub> | n <sub>2</sub> | R <sub>2</sub> | C <sub>ads</sub> |
|-------------------------------------------|------------------|------------------|----------------|----------------|------------------|
| 0                                         | 3.009            | 0.0061876        | 0.76181        | 966.2          | 0.001779         |
| -0.01                                     | 2.986            | 0.0059692        | 0.78386        | 710.9          | 0.001964         |
| -0.02                                     | 2.936            | 0.0059603        | 0.78498        | 615.7          | 0.001965         |
| -0.03                                     | 2.94             | 0.0059975        | 0.78155        | 457.9          | 0.001937         |
| -0.04                                     | 2.943            | 0.0060444        | 0.76509        | 350.4          | 0.00175          |
| -0.05                                     | 2.946            | 0.0060523        | 0.7565         | 229.9          | 0.001649         |
| -0.06                                     | 2.97             | 0.0062793        | 0.72787        | 152.7          | 0.001407         |
| -0.07                                     | 2.977            | 0.0063507        | 0.708          | 96.83          | 0.001221         |
| -0.08                                     | 2.987            | 0.0071879        | 0.68781        | 59.28          | 0.00123          |
| -0.09                                     | 2.979            | 0.0073367        | 0.65845        | 40.45          | 0.000973         |
| -0.1                                      | 2.978            | 0.0079897        | 0.633114       | 28.1           | 0.000864         |

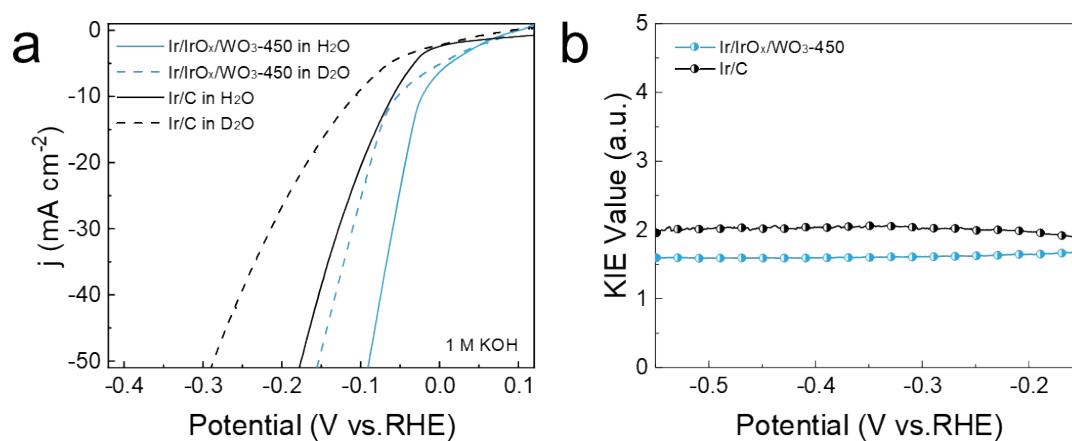**Fig. S20.** (a) The polarization curves of Ir/IrO<sub>x</sub>/WO<sub>3</sub>-450 and Ir/C electrodes measured in H<sub>2</sub>O or D<sub>2</sub>O solution with 1.0 M KOH; (b) the ratio of the current density of electrocatalysts in H<sub>2</sub>O to that in D<sub>2</sub>O.

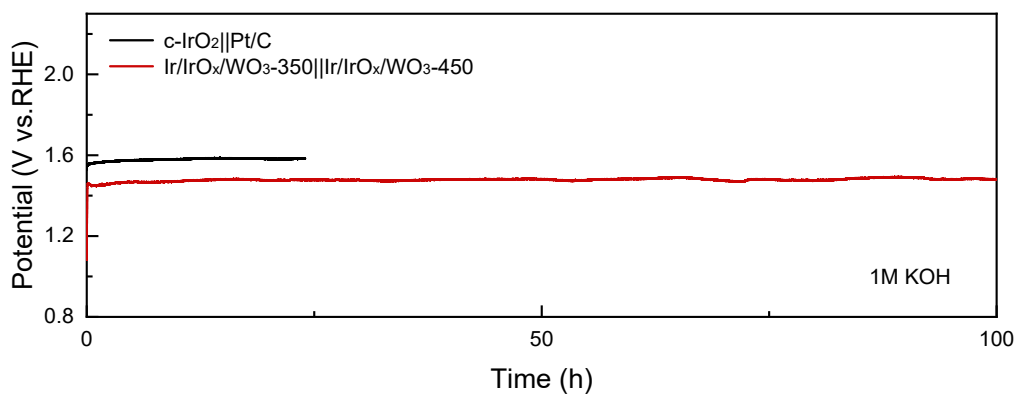

**Fig. S21.** Galvanostatic stability of the overall water splitting using Ir/IrO<sub>x</sub>/WO<sub>3</sub>-350 || Ir/IrO<sub>x</sub>/WO<sub>3</sub>-450 and c-IrO<sub>2</sub> || Pt/C catalyst operated at 10 mA/cm<sup>2</sup> in 1.0 M KOH.

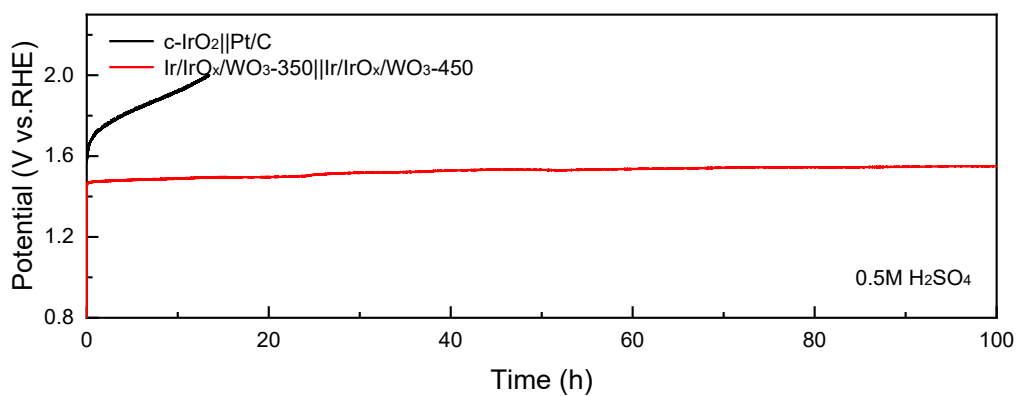

**Fig. S22.** Galvanostatic stability of the overall water splitting using Ir/IrO<sub>x</sub>/WO<sub>3</sub>-350 || Ir/IrO<sub>x</sub>/WO<sub>3</sub>-450 and c-IrO<sub>2</sub> || Pt/C catalyst operated at 10 mA/cm<sup>2</sup> in 0.5 M H<sub>2</sub>SO<sub>4</sub>.

**Table. S7.** Summary of Ir-based and Ru-based catalysts for water splitting.

| Catalyst                             | Electrolyte                                        | Cell voltage (V) | Stability at 10 mA cm <sup>-2</sup> (h) | Ref       |
|--------------------------------------|----------------------------------------------------|------------------|-----------------------------------------|-----------|
| Ir/IrO <sub>x</sub> /WO <sub>3</sub> | 0.5M H <sub>2</sub> SO <sub>4</sub> ;<br>1.0 M KOH | 1.481;<br>1.481  | 100                                     | This work |
| IrW ND                               | 0.5M H <sub>2</sub> SO <sub>4</sub> ;<br>1.0 M KOH | 1.480;<br>1.548  | 8                                       | 16        |
| IrW nanobranches                     | 0.1 M HClO <sub>4</sub> ;<br>1.0 M KOH             | 1.580;<br>1.600  | 17                                      | 17        |
| Ir VG                                | 0.5M H <sub>2</sub> SO <sub>4</sub> ;<br>1.0 M KOH | 1.580;<br>1.570  | -                                       | 18        |
| Li-IrSe <sub>2</sub>                 | 0.5M H <sub>2</sub> SO <sub>4</sub> ;<br>1.0 M KOH | 1.440;<br>1.480  | 1.47 V@24 h<br>1.52 V@24 h              | 19        |
| Ir-NSs                               | 0.5M H <sub>2</sub> SO <sub>4</sub> ;<br>1.0 M KOH | 1.586;<br>1.575  | 5 mA cm <sup>-2</sup><br>@10 h          | 20        |
| Ir-NR/C                              | 0.5M H <sub>2</sub> SO <sub>4</sub> ;<br>1.0 M KOH | 1.550;<br>1.570  | 12                                      | 21        |
| Ir-NSG                               | 0.5M H <sub>2</sub> SO <sub>4</sub> ;<br>1.0 M KOH | 1.420;<br>1.450  | 24                                      | 22        |
| P-IrO <sub>x</sub> @DG               | 0.5M H <sub>2</sub> SO <sub>4</sub> ;<br>1.0 M KOH | 1.480;<br>1.530  | -                                       | 23        |
| Ru@MoO(S) <sub>3</sub>               | 0.5M H <sub>2</sub> SO <sub>4</sub> ;<br>1.0 M KOH | 1.522;<br>1.526  | 24                                      | 24        |
| RuCu NSs/C                           | 0.5M H <sub>2</sub> SO <sub>4</sub> ;<br>1.0 M KOH | 1.490;<br>1.490  | 15                                      | 25        |

## References

- 1 W.-H. Lai, L.-F. Zhang, W.-B. Hua, S. Indris, Z.-C. Yan, Z. Hu, B. Zhang, Y. Liu, L. Wang, M. Liu, R. Liu, Y.-X. Wang, J.-Z. Wang, Z. Hu, H.-K. Liu, S.-L. Chou and S.-X. Dou, General  $\pi$ -electron-assisted strategy for Ir, Pt, Ru, Pd, Fe, Ni single-atom electrocatalysts with bifunctional active sites for highly efficient water splitting, *Angew. Chem. Int. Ed.*, 2019, **58**, 11868-11873.
- 2 Q. Wang, X. Huang, Z. L. Zhao, M. Wang, B. Xiang, J. Li, Z. Feng, H. Xu and M. Gu, Ultrahigh-loading of Ir single atoms on NiO matrix to dramatically enhance oxygen evolution reaction, *J. Am. Chem. Soc.*, 2020, **142**, 7425-7433.
- 3 C. Cai, M. Wang, S. Han, Q. Wang, Q. Zhang, Y. Zhu, X. Yang, D. Wu, X. Zu, G. E. Sterbinsky, Z. Feng and M. Gu, Ultrahigh oxygen evolution reaction activity achieved using Ir single atoms on amorphous CoO<sub>x</sub> nanosheets, *ACS Catal.*, 2021, **11**, 123-130.
- 4 Z. Li, D. Liu, X. Lu, M. Du, Z. Chen, J. Teng, R. Sha and L. Tian, Boosting oxygen evolution of layered double hydroxide through electronic coupling with ultralow noble metal doping, *Dalton Trans.*, 2022, **51**, 1527-1532.



- 5 J. Xu, Z. Lian, B. Wei, Y. Li, O. Bondarchuk, N. Zhang, Z. Yu, A. Araujo, I. Amorim, Z. Wang, B. Li and L. Liu, Acid-stable tellurium nanoparticle support for efficient and durable oxygen evolution in acidic and neutral media, *ACS Catal.*, 2020, **10**, 3571-3579.
- 6 G. Li, K. Li, L. Yang, J. Chang, R. Ma, Z. Wu, J. Ge, C. Liu and W. Xing, Boosted performance of Ir species by employing TiN as the support toward oxygen evolution reaction, *ACS Appl. Mater. Interfaces*, 2018, **10**, 38117-38124.
- 7 H.-S. Oh, H. N. Nong, T. Reier, M. Gliech and P. Strasser, Oxide-supported Ir nanodendrites with high activity and durability for the oxygen evolution reaction in acid PEM water electrolyzers, *Chem. Sci.*, 2015, **6**, 3321-3328.
- 8 J. Shan, C. Guo, Y. Zhu, S. Chen, L. Song, M. Jaroniec, Y. Zheng and S.-Z. Qiao, Charge-redistribution-enhanced nanocrystalline Ru@IrO<sub>x</sub> electrocatalysts for oxygen evolution in acidic media, *Chem*, 2019, **5**, 445-459.
- 9 Z. Shi, Y. Wang, J. Li, X. Wang, Y. Wang, Y. Li, W. Xu, Z. Jiang, C. Liu, W. Xing and J. Ge, Confined Ir single sites with triggered lattice oxygen redox: Toward boosted and sustained water oxidation catalysis, *Joule*, 2021, **5**, 2164-2176.
- 10 K. Zhang, W. Mai, J. Li, H. Wang, G. Li and W. Hu, Highly scattered Ir oxides on TiN as an efficient oxygen evolution reaction electrocatalyst in acidic media, *J. Mater. Sci.*, 2020, **55**, 3507-3520.
- 11 Z. Lu, C. Wei, X. Liu, Y. Fang, X. Hao, Y. Zang, Z. Pei, J. Cai, Y. Wu, D. Niu, A. Mosallanezhad, D. Sun, J. Ye, S. Niu and G. Wang, Regulating the adsorption behavior of intermediates on Ir-W@Ir-WO<sub>3-x</sub> boosts acidic water oxidation electrocatalysis, *Mater. Chem. Front.*, 2021, **5**, 6092-6100.
- 12 J. Chen, P. Cui, G. Zhao, K. Rui, M. Lao, Y. Chen, X. Zheng, Y. Jiang, H. Pan, S. X. Dou and W. Sun, Low-coordinate iridium oxide confined on graphitic carbon nitride for highly efficient oxygen evolution, *Angew. Chem., Int. Ed.*, 2019, **58**, 12540-12544.
- 13 G. Wu, X. Zheng, P. Cui, H. Jiang, X. Wang, Y. Qu, W. Chen, Y. Lin, H. Li, X. Han, Y. Hu, P. Liu, Q. Zhang, J. Ge, Y. Yao, R. Sun, Y. Wu, L. Gu, X. Hong and Y. Li, A general synthesis approach for amorphous noble metal nanosheets, *Nat. Commun.*, 2019, **10**, 4855.
- 14 H. Wang, Z.-n. Chen, D. Wu, M. Cao, F. Sun, H. Zhang, H. You, W. Zhuang and R. Cao, Significantly enhanced overall water splitting performance by partial oxidation of Ir through Au modification in core-shell alloy structure, *J. Am. Chem. Soc.*, 2021, **143**, 4639-4645.
- 15 F. Luo, H. Hu, X. Zhao, Z. Yang, Q. Zhang, J. Xu, T. Kaneko, Y. Yoshida, C. Zhu and W. Cai, Robust and stable acidic overall water splitting on Ir single atoms, *Nano Lett.*, 2020, **20**, 2120-2128.
- 16 F. Lv, J. Feng, K. Wang, Z. Dou, W. Zhang, J. Zhou, C. Yang, M. Luo, Y. Yang, Y. Li, P. Gao and S. Guo, Iridium-tungsten alloy nanodendrites as pH-universal water-splitting electrocatalysts, *ACS Cent. Sci.*, 2018, **4**, 1244-1252.
- 17 L. Fu, X. Hu, Y. Li, G. Cheng and W. Luo, IrW nanobranches as an advanced electrocatalyst for pH-universal overall water splitting, *Nanoscale*, 2019, **11**, 8898-8905.
- 18 S. B. Roy, K. Akbar, J. H. Jeon, S.-K. Jerng, L. Truong, K. Kim, Y. Yi and S.-H. Chun, Iridium on vertical graphene as an all-round catalyst for robust water splitting reactions, *J. Mater. Chem. A*, 2019, **7**, 20590-20596.
- 19 T. Zheng, C. Shang, Z. He, X. Wang, C. Cao, H. Li, R. Si, B. Pan, S. Zhou and J. Zeng, Intercalated iridium diselenide electrocatalysts for efficient pH-universal water splitting, *Angew. Chem. Int. Ed.*, 2019, **58**, 14764-14769.
- 20 Z. Cheng, B. Huang, Y. Pi, L. Li, Q. Shao and X. Huang, Partially hydroxylated ultrathin iridium

- nanosheets as efficient electrocatalysts for water splitting, *Natl. Sci. Rev.*, 2020, **7**, 1340-1348.
- 21 F. Luo, L. Guo, Y. Xie, J. Xu, K. Qu and Z. Yang, Iridium nanorods as a robust and stable bifunctional electrocatalyst for pH-universal water splitting, *Appl. Catal. B*, 2020, **279**, 119394.
- 22 Q. Wang, C.-Q. Xu, W. Liu, S.-F. Hung, H. Bin Yang, J. Gao, W. Cai, H. M. Chen, J. Li and B. Liu, Coordination engineering of iridium nanocluster bifunctional electrocatalyst for highly efficient and pH-universal overall water splitting, *Nat. Commun.*, 2020, **11**, 4246.
- 23 L. Zhuang, F. Xu, K. Wang, J. Li, C. Liang, W. Zhou, Z. Xu, Z. Shao and Z. Zhu, Porous structure engineering of iridium oxide nanoclusters on atomic scale for efficient pH-universal overall water splitting, *Small*, 2021, **17**, 2100121.
- 24 D. Chen, R. Yu, D. Wu, H. Zhao, P. Wang, J. Zhu, P. Ji, Z. Pu, L. Chen, J. Yu and S. Mu, Anion-modulated molybdenum oxide enclosed ruthenium nano-capsules with almost the same water splitting capability in acidic and alkaline media, *Nano Energy*, 2022, **100**, 107445.
- 25 Q. Yao, B. Huang, N. Zhang, M. Sun, Q. Shao and X. Huang, Channel-rich RuCu nanosheets for pH-universal overall water splitting electrocatalysis, *Angew. Chem. Inter. Ed.*, 2019, **58**, 13983-13988.
